# Supplementary material for: Macroporous LiFePO4 as a cathode for an aqueous rechargeable lithium battery of high energy density
Source: Royal Society of Chemistry journal article supplement (doi:10.1039/c3ta13472e), 2013-01-01
Supplement: c3ta13472e.pdf [file c3ta13472e.pdf]

## Supporting Information

### A macroporous $\text{LiFePO}_4$ as a cathode for an aqueous rechargeable lithium battery of high energy density

Yuyang Hou<sup>a</sup>, Xujiong Wang<sup>a</sup>, Yusong Zhu<sup>a</sup>, Chenglin Hu<sup>a</sup>, Zheng Chang<sup>a</sup>, Yuping Wu<sup>\*a</sup> and Rudolf Holze<sup>b</sup>

#### 1. The SEM micrograph of the PS template

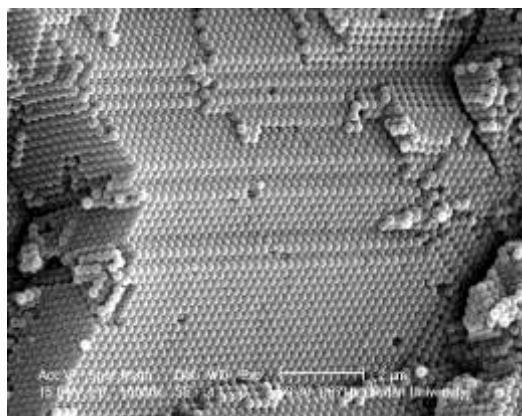

**Figure S1.** SEM micrograph of the PS template to prepare three dimensional (3D)-ordered macroporous  $\text{LiFePO}_4$ .

The SEM of the PS template is shown in **Figure S1**. The stacking of the PS particles is three-dimensionally regular and the shapes of the pores are very uniform. The PS particle size is about 200 nm.

#### 2. Cycling behaviour of the $\text{LiFePO}_4$ cathode in $0.5 \text{ mol l}^{-1} \text{ Li}_2\text{SO}_4$ aqueous solution

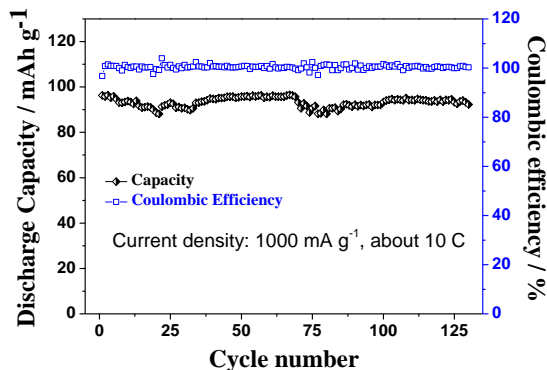

**Figure S2.** Cycling behaviour of the  $\text{LiFePO}_4$  cathode in  $0.5 \text{ mol l}^{-1} \text{ Li}_2\text{SO}_4$  aqueous solution at the current density of  $1000 \text{ mA g}^{-1}$ .

Cycling behaviour of the  $\text{LiFePO}_4$  cathode in  $0.5 \text{ mol l}^{-1} \text{ Li}_2\text{SO}_4$  aqueous solution at the current density of  $1000 \text{ mA g}^{-1}$  is shown in **Figure S2**, which was tested using activated carbon as the counter electrode and SCE as the reference electrode. It shows clearly that the  $\text{LiFePO}_4$  in the aqueous solution presents good cycling behaviour as in the aqueous electrolytes.

3. The “cross-over” effect of  $\text{Li}^+$  ions in the composite coating

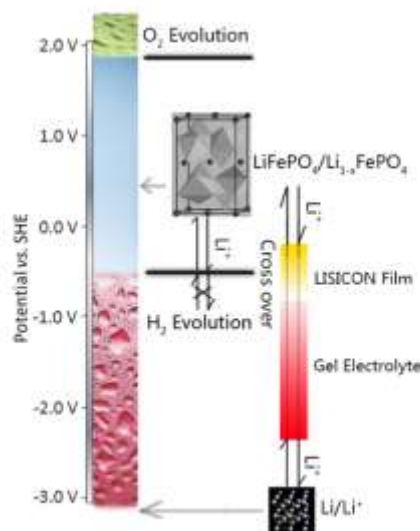

**Figure S3** Schematic illustration of the “cross-over” effect of  $\text{Li}^+$  ions in the composite coating.
